# Supplementary material for: GSK3787-Loaded Poly(Ester Amide) Particles for Intra-Articular Drug Delivery
Source: Polymers (Basel). 2020 Mar 26;12(4):736. doi: 10.3390/polym12040736 (PMC7240550; doi:10.3390/polym12040736)
Supplement: Supplementary file 1 [file polymers-12-00736-s001.pdf]

Supporting information for:

## **GSK3787-loaded Poly(ester amide) Particles for Intra-articular**

### **Drug Delivery**

**Ian J. Villamagna<sup>1,2</sup>, Danielle M. McRae<sup>3</sup>, Aneta Borecki<sup>3</sup>, Dawn Bryce<sup>4</sup>, François Lagugné-Labarthet<sup>2,3</sup>, Frank Beier<sup>2,4</sup>, and Elizabeth R. Gillies<sup>1,2,3,5\*</sup>**

<sup>1</sup> School of Biomedical Engineering, The University of Western Ontario, London, Ontario, N6A 5B9, Canada

<sup>2</sup> Bone and Joint Institute, The University of Western Ontario, London, Ontario, N6A 5B9, Canada

<sup>3</sup> Department of Chemistry, The University of Western Ontario, London, Ontario, N6A 5B7, Canada

<sup>4</sup> Department of Physiology and Pharmacology, The University of Western Ontario, London, Ontario, N6A 3B7, Canada

<sup>5</sup> Department of Chemical and Biochemical Engineering, The University of Western Ontario, London, Ontario, N6A 5B9, Canada

\* Correspondence: egillie@uwo.ca; Tel.: 519-661-2111 ext 80223

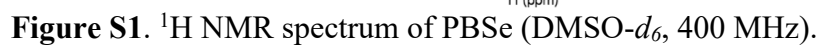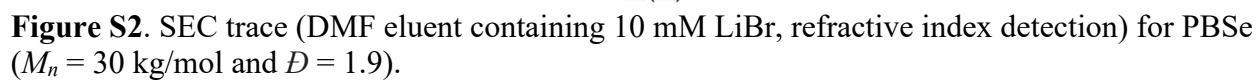

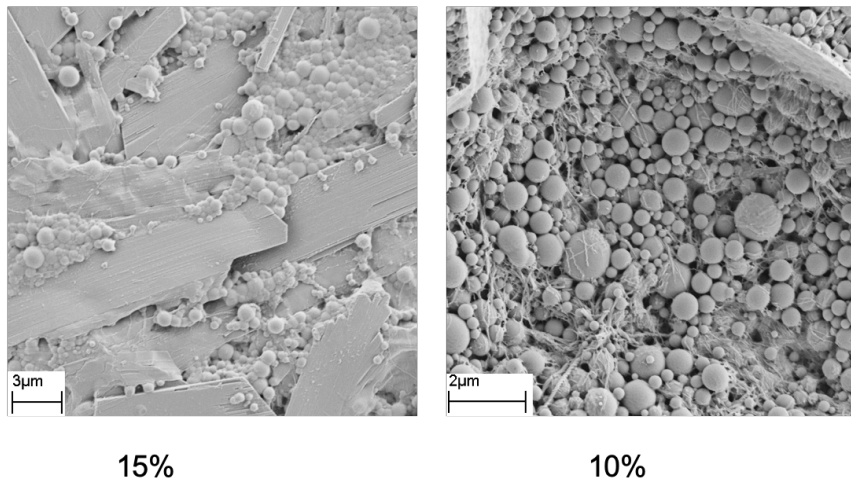

**Figure S3.** Scanning electron micrographs of particles prepared with different amounts of GSK3787 added. Particles with 15 wt% of GSK3787 added to the dispersed phase of the emulsion did form, but in small numbers and with large amounts of excess, non-particle, material (left). Particles with 10 wt% of GSK3787 did form, and were of spherical morphology and had a good size distribution, but had visible polymer remaining in the samples (right).

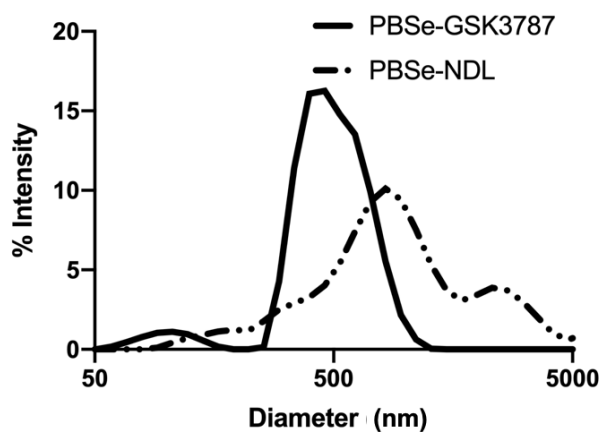

**Figure S4.** DLS diameter distributions by intensity % of PBSe-GSK3787 and PBSe-NDL particles showing the smaller diameters of the drug-loaded particles.

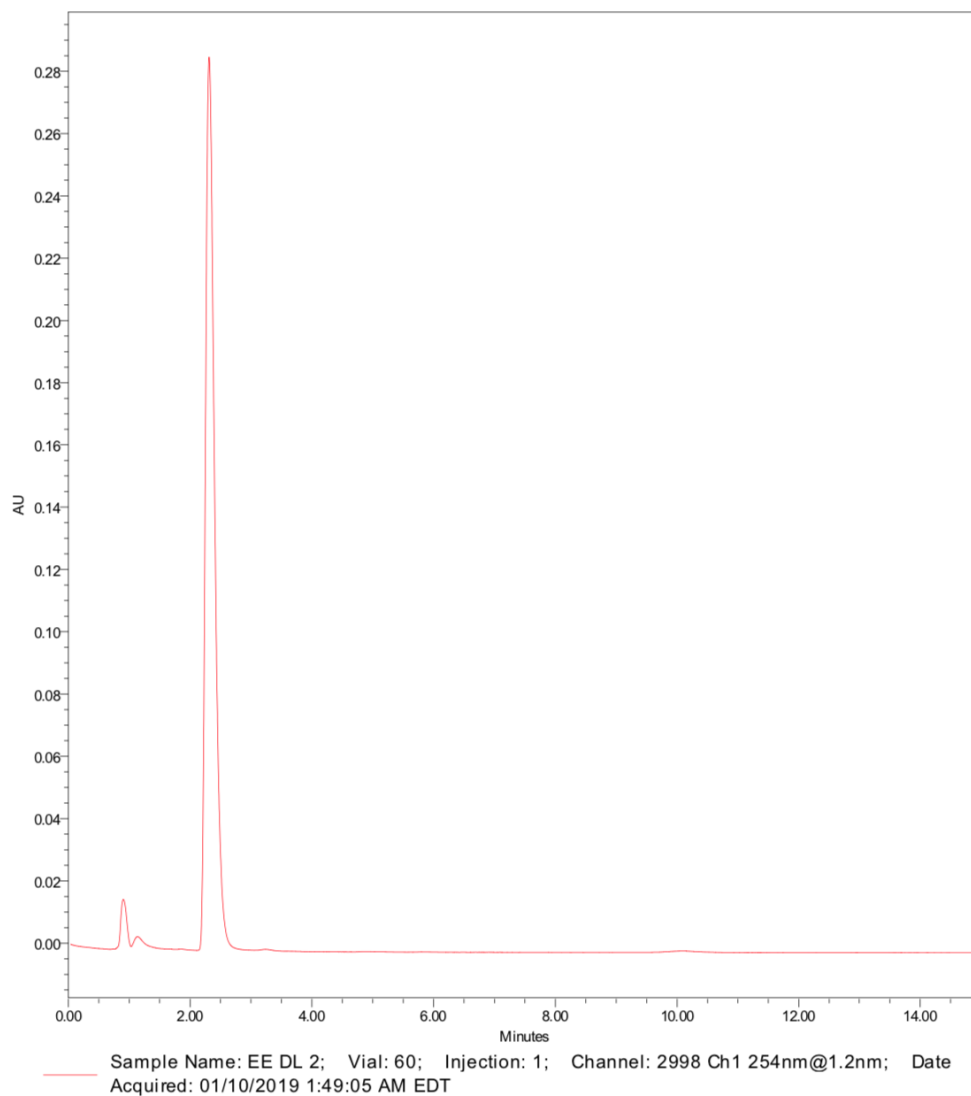

**Figure S5.** Representative HPLC trace of GSK3787 as measured for drug loading and encapsulation efficiency of particles.

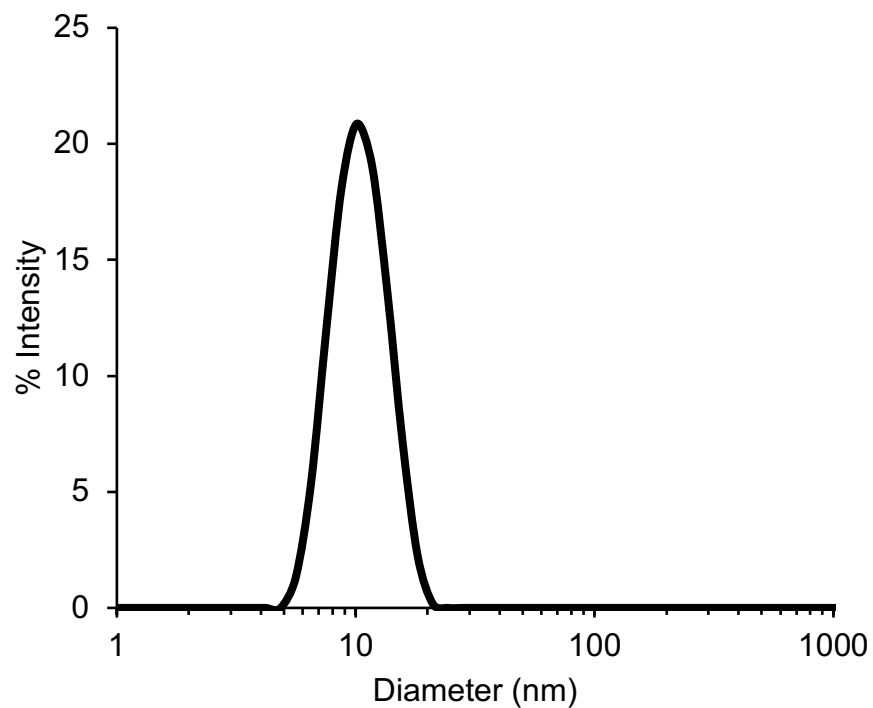

**Figure S6.** DLS diameter distributions by intensity % of GSK3787 (0.1 mg/mL) in a 2 wt% solution of polysorbate 80 in PBS at 37 °C. The absence of turbidity and presence of assemblies with diameters of ~10 nm suggest that the drug was incorporated into polysorbate micelles at this concentration.

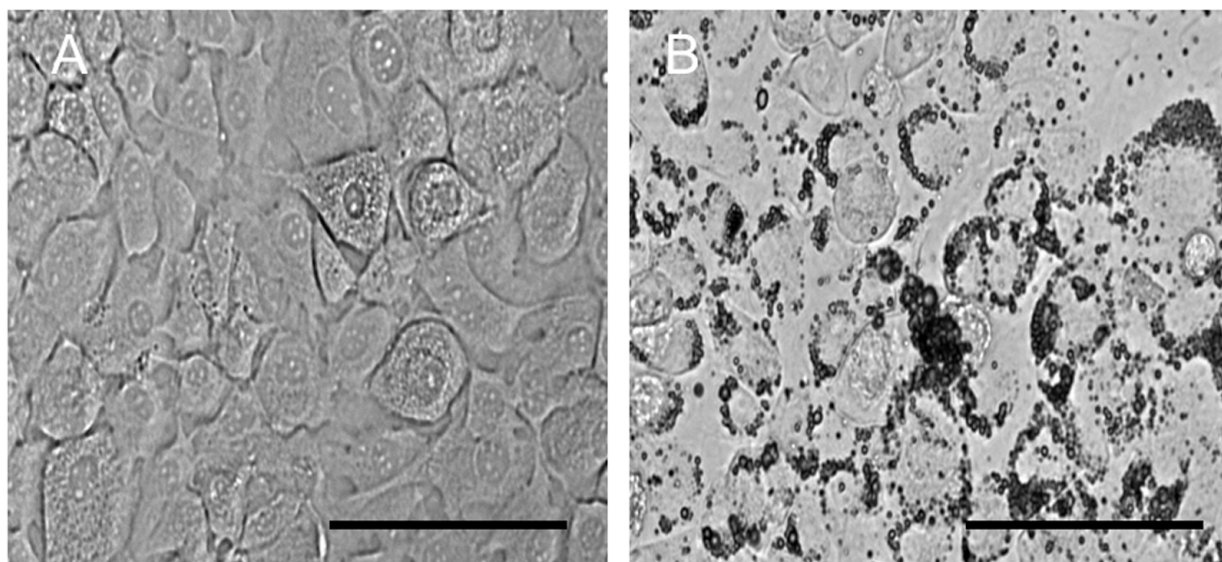

**Figure S7.** Zoomed brightfield images of live IMAC cells treated with A) no particles; B) 150 µg/mL of PBSe-GSK3787 particles. No noticeable changes in cell morphology were observed. Scale bar = 100 µm.

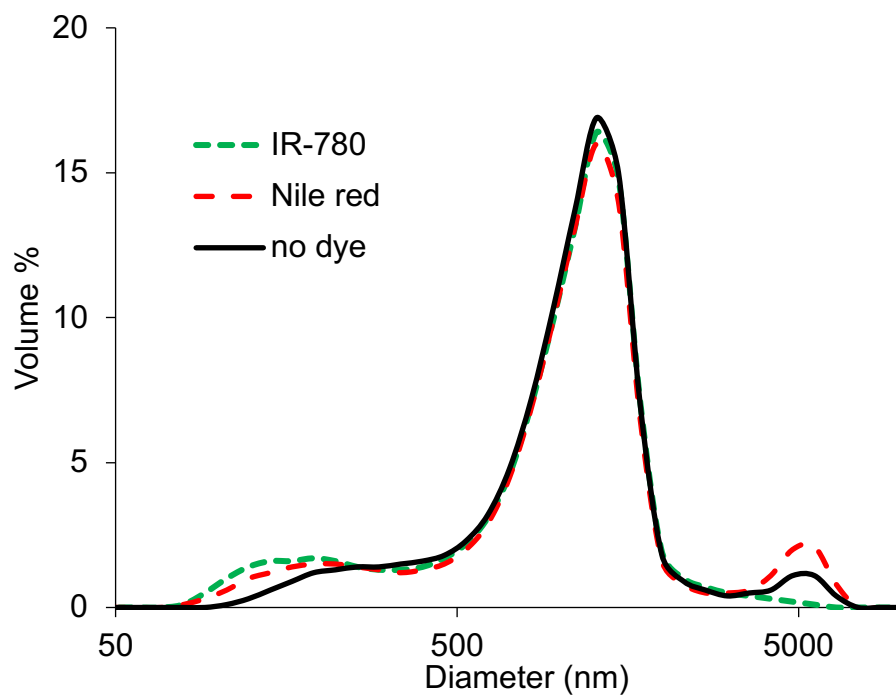

**Figure S8.** Representative DLS diameter distributions by volume % of PBSe-NDL particles prepared without dye, with 1.25 wt% Nile red, or with 1.25 wt% IR-780. All led to very similar size distributions.
